# Supplementary material for: The journey of lithium ions in the lattice of PNb9O25
Source: Royal Society of Chemistry journal article supplement (doi:10.1039/c9qm00694j), 2019-12-20
Supplement: c9qm00694j1.pdf [file c9qm00694j1.pdf]

## Supporting Information

### **The Journey that Lithium Ions Travel in the Lattice of $\text{PNb}_9\text{O}_{25}$**

Haoxiang Yu,<sup>†, ‡, 1</sup> Jundong Zhang,<sup>‡, 1</sup> Runtian Zheng,<sup>‡</sup> Tingting Liu,<sup>‡</sup> Na Peng,<sup>‡</sup> Yu Yuan,<sup>‡</sup> Yufei Liu,<sup>‡</sup> Jie Shu,<sup>‡, \*</sup> Zhen-Bo Wang<sup>†, \*\*</sup>

<sup>†</sup> *MIT Key Laboratory of Critical Materials Technology for New Energy Conversion and Storage, School of Chemistry and Chemical Engineering, State Key Lab of Urban Water Resource and Environment, Harbin Institute of Technology, No.92 West-Da Zhi Street, Harbin 150001, Heilongjiang Province, People's Republic of China*

<sup>‡</sup> *Faculty of Materials Science and Chemical Engineering, and Key Laboratory of Photoelectric Detection Materials and Devices of Zhejiang Province, Ningbo University, No. 818 Fenghua Road, Ningbo 315211, Zhejiang Province, People's Republic of China*

<sup>1</sup> *These authors contributed equally to this work.*

\* Corresponding author: Jie Shu

E-mail: [shujie@nbu.edu.cn](mailto:shujie@nbu.edu.cn)

\*\* Corresponding author: Zhen-Bo Wang

E-mail: [wangzhib@hit.edu.cn](mailto:wangzhib@hit.edu.cn)

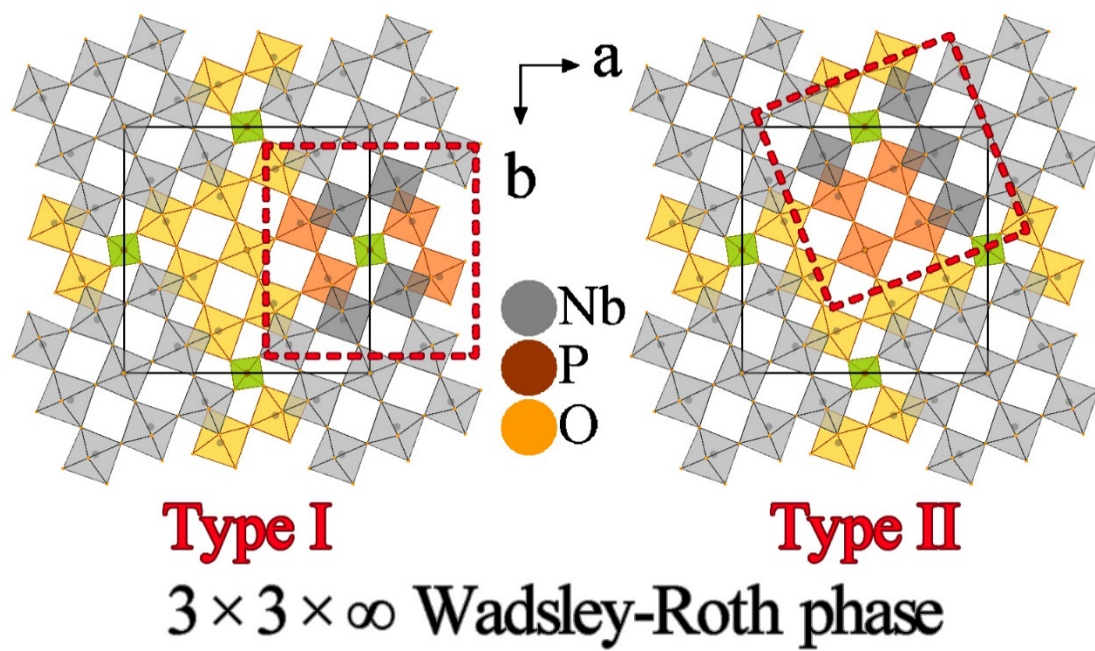

**Figure S1.** The two cavity types in PNB<sub>9</sub>O<sub>25</sub>.

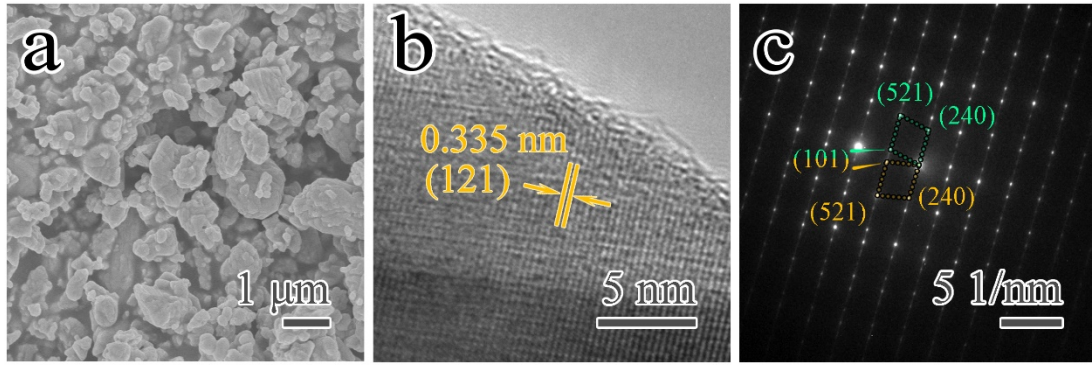

**Figure S2.** (a) SEM image of  $\text{PNb}_9\text{O}_{25}$ . (b) High-resolution TEM image of  $\text{PNb}_9\text{O}_{25}$ .

(c) SEAD pattern of  $\text{PNb}_9\text{O}_{25}$ .
